# Supplementary material for: Market-approved convolutional neural network tasked with classifying skin lesions under suspicion of melanoma: performance across primary care clinics within Australia
Source: PeerJ. 2025 Aug 28;13:e19876. doi: 10.7717/peerj.19876 (PMC12399074; doi:10.7717/peerj.19876)
Supplement: Supplemental Information 2 [file peerj-13-19876-s002.xlsx]

## Sheet: Sheet1
Clinician	Clinic	Age	Gender	Fam_Hx_Mel	Prev_Hx_Mel	Patient_Aware	Referred_by_MD	Magnification	Risk_score	Category	AI_Diagnosis	Histopathology	MIS_or_Invasive	Location	Area(mm2)
1	Gold Coast	70	Male	No	No	No	No	20x	0.9	Suspicious 0.5-1.0	Positive >0.50	Positive	Invasive	Abdomen	8.56
1	Gold Coast	52	Male	No	No	No	No	20x	0.93	Suspicious 0.5-1.0	Positive >0.50	Negative	NA	Leg (lower)	NR
1	Gold Coast	52	Male	No	No	No	No	20x	0.12	Unsuspicious 0-0.2	Negative <0.49	Negative	NA	Back	NR
1	Gold Coast	71	Male	No	Yes	No	No	20x	0.89	Suspicious 0.5-1.0	Positive >0.50	Positive	MIS	Back	NR
1	Gold Coast	33	Female	Yes	No	Yes	No	20x	0.63	Suspicious 0.5-1.0	Positive >0.50	Negative	NA	Back	NR
1	Gold Coast	33	Female	Yes	No	Yes	No	20x	0.12	Unsuspicious 0-0.2	Negative <0.49	Negative	NA	Leg (lower)	NR
1	Gold Coast	39	Male	No	Yes	Yes	No	20x	0.75	Suspicious 0.5-1.0	Positive >0.50	Positive	Invasive	Shoulder	29.37
1	Gold Coast	59	Male	Yes	Yes	No	No	20x	0.1	Unsuspicious 0-0.2	Negative <0.49	Negative	NA	Abdomen	13.4
1	Gold Coast	63	Male	Yes	No	No	No	20x	0.15	Unsuspicious 0-0.2	Negative <0.49	Positive	Invasive	Arm	NR
1	Gold Coast	36	Female	Yes	No	No	No	20x	0.28	Requires Classification 0.21-0.49	Negative <0.49	Negative	NA	Arm	6.57
1	Gold Coast	36	Female	Yes	No	No	No	20x	0.19	Unsuspicious 0-0.2	Negative <0.49	Negative	NA	Abdomen	7.11
1	Gold Coast	38	Male	Yes	Yes	No	No	20x	0.9	Suspicious 0.5-1.0	Positive >0.50	Negative	NA	Back	21.63
1	Gold Coast	38	Male	Yes	Yes	No	No	20x	0.9	Suspicious 0.5-1.0	Positive >0.50	Negative	NA	Chest	4.06
1	Gold Coast	38	Male	Yes	Yes	No	No	20x	0.15	Unsuspicious 0-0.2	Negative <0.49	Negative	NA	Arm	13.54
1	Gold Coast	30	Male	No	No	No	No	20x	0.12	Unsuspicious 0-0.2	Negative <0.49	Negative	NA	Back	5.5
1	Gold Coast	39	Male	No	Yes	No	No	20x	0.22	Requires Classification 0.21-0.49	Negative <0.49	Negative	NA	Back	5.02
1	Gold Coast	56	Female	No	No	No	No	20x	0.11	Unsuspicious 0-0.2	Negative <0.49	Positive	MIS	Back	4.04
1	Gold Coast	79	Male	No	No	Yes	Yes	20x	0.88	Suspicious 0.5-1.0	Positive >0.50	Positive	MIS	Thigh (upper leg)	28.09
1	Gold Coast	79	Male	No	No	No	Yes	20x	0.87	Suspicious 0.5-1.0	Positive >0.50	Positive	MIS	Leg (lower)	25
1	Gold Coast	79	Male	No	No	No	Yes	20x	0.87	Suspicious 0.5-1.0	Positive >0.50	Negative	NA	Chest	19.28
1	Gold Coast	38	Female	Yes	No	Yes	No	20x	0.15	Unsuspicious 0-0.2	Negative <0.49	Negative	NA	Leg (lower)	5.14
1	Gold Coast	59	Male	No	No	No	No	20x	0.12	Unsuspicious 0-0.2	Negative <0.49	Negative	NA	Back	20.12
1	Gold Coast	49	Male	No	No	No	No	20x	0.8	Suspicious 0.5-1.0	Positive >0.50	Negative	NA	Chest	7.19
1	Gold Coast	68	Male	No	No	No	No	20x	0.55	Suspicious 0.5-1.0	Positive >0.50	Negative	NA	Thigh (upper leg)	NR
1	Gold Coast	63	Female	Yes	No	Yes	Yes	20x	0.81	Suspicious 0.5-1.0	Positive >0.50	Positive	Invasive	Abdomen	36.19
1	Gold Coast	29	Female	No	Yes	No	No	20x	0.11	Unsuspicious 0-0.2	Negative <0.49	Positive	MIS	Leg (lower)	5.68
1	Gold Coast	29	Male	No	No	No	No	20x	0.1	Unsuspicious 0-0.2	Negative <0.49	Negative	NA	Back	16.95
1	Gold Coast	68	Female	No	No	Yes	Yes	20x	0.85	Suspicious 0.5-1.0	Positive >0.50	Negative	NA	Thigh (upper leg)	2.63
1	Gold Coast	53	Male	Yes	No	No	No	20x	0.46	Requires Classification 0.21-0.49	Negative <0.49	Positive	Invasive	Back	3.25
1	Gold Coast	65	Male	No	No	No	No	20x	0.33	Requires Classification 0.21-0.49	Negative <0.49	Positive	MIS	Shoulder	19.84
1	Gold Coast	63	Male	No	No	No	No	20x	0.11	Unsuspicious 0-0.2	Negative <0.49	Negative	NA	Leg (lower)	1.76
1	Gold Coast	52	Male	No	No	No	No	20x	0.88	Suspicious 0.5-1.0	Positive >0.50	Negative	NA	Back	5.88
1	Gold Coast	38	Female	Yes	No	No	No	20x	0.12	Unsuspicious 0-0.2	Negative <0.49	Positive	Invasive	Back	7.66
1	Gold Coast	44	Male	Yes	Yes	No	No	20x	0.83	Suspicious 0.5-1.0	Positive >0.50	Negative	NA	Thigh (upper leg)	2.24
1	Gold Coast	44	Female	No	No	No	No	20x	0.46	Requires Classification 0.21-0.49	Negative <0.49	Negative	NA	Head/scalp	3.54
1	Gold Coast	29	Female	No	Yes	No	No	20x	0.6	Suspicious 0.5-1.0	Positive >0.50	Negative	NA	Abdomen	5.65
1	Gold Coast	53	Male	No	No	No	No	20x	0.2	Unsuspicious 0-0.2	Negative <0.49	Negative	NA	Back	NR
1	Gold Coast	60	Male	Yes	Yes	No	No	20x	0.89	Suspicious 0.5-1.0	Positive >0.50	Negative	NA	Back	7.43
1	Gold Coast	50	Male	No	No	Yes	No	20x	0.11	Unsuspicious 0-0.2	Negative <0.49	Negative	NA	Heel/foot	6.37
1	Gold Coast	29	Female	No	No	No	No	20x	0.82	Suspicious 0.5-1.0	Positive >0.50	Negative	NA	Back	9.11
1	Gold Coast	53	Male	Yes	No	Yes	No	20x	0.88	Suspicious 0.5-1.0	Positive >0.50	Negative	NA	Head/scalp	19.46
1	Gold Coast	72	Male	No	No	No	Yes	20x	0.34	Requires Classification 0.21-0.49	Negative <0.49	Negative	NA	Thigh (upper leg)	9.29
1	Gold Coast	57	Female	No	No	Yes	No	20x	0.82	Suspicious 0.5-1.0	Positive >0.50	Positive	MIS	Back	23.81
1	Gold Coast	57	Female	No	No	No	No	20x	0.12	Unsuspicious 0-0.2	Negative <0.49	Negative	NA	Back	37.34
1	Gold Coast	41	Male	Yes	No	No	No	20x	0.13	Unsuspicious 0-0.2	Negative <0.49	Positive	MIS	Back	25.07
1	Gold Coast	53	Female	No	No	No	No	20x	0.83	Suspicious 0.5-1.0	Positive >0.50	Positive	MIS	Leg (lower)	2.81
1	Gold Coast	25	Female	Yes	No	No	No	20x	0.87	Suspicious 0.5-1.0	Positive >0.50	Negative	NA	Back	29.88
1	Gold Coast	78	Female	No	No	No	No	20x	0.44	Requires Classification 0.21-0.49	Negative <0.49	Negative	NA	Face	16.87
1	Gold Coast	56	Male	No	No	No	Yes	20x	0.86	Suspicious 0.5-1.0	Positive >0.50	Positive	MIS	Chest	18.71
1	Gold Coast	47	Male	No	No	No	No	20x	0.35	Requires Classification 0.21-0.49	Negative <0.49	Negative	NA	Heel/foot	2.09
1	Gold Coast	65	Male	No	No	No	No	20x	0.47	Requires Classification 0.21-0.49	Negative <0.49	Negative	NA	Leg (lower)	4.42
1	Gold Coast	55	Female	Yes	No	No	No	20x	0.82	Suspicious 0.5-1.0	Positive >0.50	Negative	NA	Thigh (upper leg)	12.69
1	Gold Coast	46	Male	No	No	No	No	20x	0.15	Unsuspicious 0-0.2	Negative <0.49	Positive	MIS	Abdomen	12.93
1	Gold Coast	62	Male	No	Yes	No	No	20x	0.72	Suspicious 0.5-1.0	Positive >0.50	Positive	MIS	Abdomen	21.47
1	Gold Coast	62	Male	No	Yes	No	No	20x	0.72	Suspicious 0.5-1.0	Positive >0.50	Negative	NA	Chest	28.58
1	Gold Coast	62	Male	No	Yes	No	No	20x	0.23	Requires Classification 0.21-0.49	Negative <0.49	Positive	MIS	Neck	22.27
1	Gold Coast	43	Female	Yes	No	No	No	20x	0.65	Suspicious 0.5-1.0	Positive >0.50	Negative	NA	Chest	2.39
1	Gold Coast	68	Female	No	Yes	No	No	20x	0.95	Suspicious 0.5-1.0	Positive >0.50	Negative	NA	Thigh (upper leg)	13.95
2	Townsville	36	Female	Yes	Yes	Yes	No	20x	0.93	Suspicious 0.5-1.0	Positive >0.50	Positive	MIS	Shoulder	NR
1	Gold Coast	63	Female	No	No	Yes	Yes	20x	0.37	Requires Classification 0.21-0.49	Negative <0.49	Positive	MIS	Leg (lower)	6.27
1	Gold Coast	61	Male	No	No	Yes	No	20x	0.82	Suspicious 0.5-1.0	Positive >0.50	Positive	MIS	Face	27.69
1	Gold Coast	38	Female	Yes	No	No	No	20x	0.18	Unsuspicious 0-0.2	Negative <0.49	Negative	NA	Abdomen	NR
1	Gold Coast	43	Male	Yes	No	Yes	No	20x	0.92	Suspicious 0.5-1.0	Positive >0.50	Positive	Invasive	Back	27.97
1	Gold Coast	50	Female	No	No	No	No	20x	0.1	Unsuspicious 0-0.2	Negative <0.49	Negative	NA	Back	4.52
1	Gold Coast	73	Female	No	No	Yes	No	20x	0.7	Suspicious 0.5-1.0	Positive >0.50	Positive	MIS	Arm	24.15
1	Gold Coast	65	Female	No	No	No	No	20x	0.1	Unsuspicious 0-0.2	Negative <0.49	Negative	NA	Back	4.74
1	Gold Coast	54	Male	Yes	No	No	Yes	20x	0.1	Unsuspicious 0-0.2	Negative <0.49	Negative	NA	Back	19.46
1	Gold Coast	71	Female	No	No	No	No	20x	0.25	Requires Classification 0.21-0.49	Negative <0.49	Negative	NA	Back	15.29
1	Gold Coast	33	Male	No	No	No	No	20x	0.4	Requires Classification 0.21-0.49	Negative <0.49	Negative	NA	Arm	6.37
1	Gold Coast	23	Male	No	No	Yes	No	20x	0.39	Requires Classification 0.21-0.49	Negative <0.49	Positive	Invasive	Neck	9.78
1	Gold Coast	49	Male	No	No	No	No	20x	0.33	Requires Classification 0.21-0.49	Negative <0.49	Positive	MIS	Leg (lower)	10.13
1	Gold Coast	48	Male	Yes	No	No	No	20x	0.32	Requires Classification 0.21-0.49	Negative <0.49	Positive	MIS	Back	20.72
1	Gold Coast	61	Female	Yes	Yes	No	No	20x	0.81	Suspicious 0.5-1.0	Positive >0.50	Negative	NA	Back	6.25
1	Gold Coast	59	Female	No	Yes	No	No	20x	0.35	Requires Classification 0.21-0.49	Negative <0.49	Negative	NA	Thigh (upper leg)	2.5
1	Gold Coast	58	Male	Yes	Yes	No	No	20x	0.54	Suspicious 0.5-1.0	Positive >0.50	Positive	MIS	Back	17.07
1	Gold Coast	83	Male	No	No	No	No	20x	0.82	Suspicious 0.5-1.0	Positive >0.50	Positive	Invasive	Arm	17.81
1	Gold Coast	43	Female	Yes	Yes	No	No	20x	0.83	Suspicious 0.5-1.0	Positive >0.50	Negative	NA	Chest	4.52
1	Gold Coast	88	Male	No	No	No	No	20x	0.93	Suspicious 0.5-1.0	Positive >0.50	Negative	NA	Ear	41.23
1	Gold Coast	69	Male	No	No	No	Yes	20x	0.95	Suspicious 0.5-1.0	Positive >0.50	Negative	NA	Neck	27.71
1	Gold Coast	69	Male	No	No	No	Yes	20x	0.87	Suspicious 0.5-1.0	Positive >0.50	Negative	NA	Back	27.74
1	Gold Coast	54	Male	No	No	No	Yes	20x	0.6	Suspicious 0.5-1.0	Positive >0.50	Negative	NA	Back	10.09
1	Gold Coast	68	Female	No	No	No	No	20x	0.9	Suspicious 0.5-1.0	Positive >0.50	Positive	MIS	Leg (lower)	9.83
1	Gold Coast	49	Male	No	Yes	No	No	20x	0.75	Suspicious 0.5-1.0	Positive >0.50	Negative	NA	Thigh (upper leg)	23.62
1	Gold Coast	49	Male	No	Yes	No	No	20x	0.6	Suspicious 0.5-1.0	Positive >0.50	Positive	Invasive	Shoulder	11.85
1	Gold Coast	60	Female	No	No	No	No	20x	0.86	Suspicious 0.5-1.0	Positive >0.50	Positive	MIS	Back	11.56
1	Gold Coast	27	Male	No	No	No	No	20x	0.1	Unsuspicious 0-0.2	Negative <0.49	Positive	MIS	Abdomen	26.83
1	Gold Coast	50	Female	Yes	No	No	No	20x	0.92	Suspicious 0.5-1.0	Positive >0.50	Positive	MIS	Back	12.4
1	Gold Coast	61	Male	Yes	No	No	No	20x	0.92	Suspicious 0.5-1.0	Positive >0.50	Positive	Invasive	Back	14.93
1	Gold Coast	69	Male	No	No	No	Yes	10x	0.28	Requires Classification 0.21-0.49	Negative <0.49	Positive	MIS	Chest	23.25
1	Gold Coast	69	Male	No	No	No	Yes	10x	0.83	Suspicious 0.5-1.0	Positive >0.50	Negative	NA	Head/scalp	23.97
1	Gold Coast	68	Female	No	Yes	No	Yes	20x	0.15	Unsuspicious 0-0.2	Negative <0.49	Positive	MIS	Back	10.14
1	Gold Coast	36	Female	Yes	No	No	No	20x	0.85	Suspicious 0.5-1.0	Positive >0.50	Negative	NA	Chest	24.28
1	Gold Coast	66	Female	No	No	No	Yes	10x	0.12	Unsuspicious 0-0.2	Negative <0.49	Negative	NA	Back	10.03
1	Gold Coast	75	Female	No	No	No	No	20x	0.88	Suspicious 0.5-1.0	Positive >0.50	Negative	NA	Leg (lower)	11.09
1	Gold Coast	31	Female	No	No	No	No	20x	0.51	Suspicious 0.5-1.0	Positive >0.50	Negative	NA	Thigh (upper leg)	7.36
1	Gold Coast	52	Female	Yes	No	No	No	20x	0.1	Unsuspicious 0-0.2	Negative <0.49	Negative	NA	Abdomen	17.38
1	Gold Coast	50	Male	No	No	No	Yes	20x	0.28	Requires Classification 0.21-0.49	Negative <0.49	Positive	MIS	Neck	37.37
1	Gold Coast	62	Male	No	No	No	Yes	20x	0.95	Suspicious 0.5-1.0	Positive >0.50	Positive	MIS	Face	16
1	Gold Coast	63	Female	No	Yes	No	No	20x	0.19	Unsuspicious 0-0.2	Negative <0.49	Negative	NA	Thigh (upper leg)	3.85
1	Gold Coast	63	Female	No	Yes	No	No	20x	0.14	Unsuspicious 0-0.2	Negative <0.49	Negative	NA	Back	5.43
1	Gold Coast	39	Female	No	No	Yes	Yes	20x	0.7	Suspicious 0.5-1.0	Positive >0.50	Negative	NA	Arm	9.16
1	Gold Coast	38	Female	Yes	No	No	No	20x	0.11	Unsuspicious 0-0.2	Negative <0.49	Negative	NA	Heel/foot	5.84
1	Gold Coast	36	Male	Yes	No	No	No	20x	0.22	Requires Classification 0.21-0.49	Negative <0.49	Negative	NA	Back	5.5
1	Gold Coast	75	Female	No	No	No	Yes	20x	0.28	Requires Classification 0.21-0.49	Negative <0.49	Negative	NA	Leg (lower)	15.29
1	Gold Coast	61	Male	No	No	No	No	20x	0.87	Suspicious 0.5-1.0	Positive >0.50	Positive	MIS	Shoulder	35.36
1	Gold Coast	60	Male	No	No	No	No	20x	0.12	Unsuspicious 0-0.2	Negative <0.49	Positive	MIS	Abdomen	16
1	Gold Coast	54	Male	No	No	No	No	20x	0.1	Unsuspicious 0-0.2	Negative <0.49	Negative	NA	Chest	13.83
1	Gold Coast	68	Male	No	No	No	No	20x	0.6	Suspicious 0.5-1.0	Positive >0.50	Positive	MIS	Chest	12.66
1	Gold Coast	59	Female	No	No	No	No	20x	0.23	Requires Classification 0.21-0.49	Negative <0.49	Negative	NA	Back	10.83
1	Gold Coast	35	Female	No	Yes	No	No	20x	0.11	Unsuspicious 0-0.2	Negative <0.49	Negative	NA	0	64
1	Gold Coast	76	Male	No	Yes	No	No	20x	0.18	Unsuspicious 0-0.2	Negative <0.49	Negative	NA	Shoulder	15.24
1	Gold Coast	56	Male	Yes	No	No	No	20x	0.29	Requires Classification 0.21-0.49	Negative <0.49	Negative	NA	Back	18.01
1	Gold Coast	31	Male	No	No	No	No	20x	0.12	Unsuspicious 0-0.2	Negative <0.49	Negative	NA	Chest	16
1	Gold Coast	73	Female	No	No	No	No	20x	0.25	Requires Classification 0.21-0.49	Negative <0.49	Negative	NA	Back	11.18
1	Gold Coast	68	Male	No	No	No	Yes	20x	0.88	Suspicious 0.5-1.0	Positive >0.50	Positive	MIS	Face	12.95
1	Gold Coast	68	Male	No	No	No	Yes	20x	0.17	Unsuspicious 0-0.2	Negative <0.49	Negative	NA	Back	22.82
1	Gold Coast	48	Female	No	No	No	No	20x	0.46	Requires Classification 0.21-0.49	Negative <0.49	Negative	NA	Back	6.7
1	Gold Coast	88	Female	No	No	No	No	20x	0.92	Suspicious 0.5-1.0	Positive >0.50	Negative	NA	Arm	34.66
1	Gold Coast	38	Male	No	No	No	Yes	20x	0.17	Unsuspicious 0-0.2	Negative <0.49	Positive	MIS	Chest	2.47
1	Gold Coast	48	Male	No	No	No	No	20x	0.13	Unsuspicious 0-0.2	Negative <0.49	Negative	NA	Back	9.94
1	Gold Coast	65	Female	Yes	No	No	No	20x	0.19	Unsuspicious 0-0.2	Negative <0.49	Negative	NA	Back	5.63
1	Gold Coast	42	Female	Yes	No	Yes	No	20x	0.16	Unsuspicious 0-0.2	Negative <0.49	Negative	NA	Leg (lower)	2.18
1	Gold Coast	50	Female	Yes	No	Yes	No	20x	0.88	Suspicious 0.5-1.0	Positive >0.50	Positive	Invasive	Thigh (upper leg)	17.56
1	Gold Coast	36	Male	No	No	No	No	20x	0.39	Requires Classification 0.21-0.49	Negative <0.49	Negative	NA	Back	3.69
1	Gold Coast	61	Male	Yes	Yes	No	No	20x	0.33	Requires Classification 0.21-0.49	Negative <0.49	Negative	NA	Back	12.59
1	Gold Coast	69	Male	No	Yes	No	Yes	20x	0.83	Suspicious 0.5-1.0	Positive >0.50	Negative	NA	Head/scalp	23.97
1	Gold Coast	69	Male	No	Yes	Yes	Yes	20x	0.28	Requires Classification 0.21-0.49	Negative <0.49	Positive	MIS	Chest	23.25
1	Gold Coast	57	Male	No	No	No	No	20x	0.32	Requires Classification 0.21-0.49	Negative <0.49	Positive	MIS	Neck	17.39
1	Gold Coast	45	Male	No	No	No	No	20x	0.15	Unsuspicious 0-0.2	Negative <0.49	Negative	NA	Back	8.38
1	Gold Coast	37	Female	No	No	No	No	20x	0.33	Requires Classification 0.21-0.49	Negative <0.49	Positive	MIS	Thigh (upper leg)	2.94
1	Gold Coast	56	Male	Yes	No	Yes	No	20x	0.2	Unsuspicious 0-0.2	Negative <0.49	Positive	MIS	Face	29.8
1	Gold Coast	35	Male	No	No	Yes	No	20x	0.15	Unsuspicious 0-0.2	Negative <0.49	Negative	NA	Ear	32.12
1	Gold Coast	64	Female	No	No	No	Yes	20x	0.29	Requires Classification 0.21-0.49	Negative <0.49	Negative	NA	Pelvis	4.09
1	Gold Coast	60	Female	No	No	No	No	20x	0.2	Unsuspicious 0-0.2	Negative <0.49	Negative	NA	Back	9.99
1	Gold Coast	34	Female	No	Yes	No	No	20x	0.15	Unsuspicious 0-0.2	Negative <0.49	Negative	NA	Shoulder	2.93
1	Gold Coast	34	Female	No	No	Yes	No	20x	0.17	Unsuspicious 0-0.2	Negative <0.49	Negative	NA	Abdomen	2.26
1	Gold Coast	50	Female	Yes	No	No	No	20x	0.87	Suspicious 0.5-1.0	Positive >0.50	Positive	MIS	Abdomen	24.89
1	Gold Coast	25	Male	No	No	No	No	20x	0.28	Requires Classification 0.21-0.49	Negative <0.49	Negative	NA	Shoulder	2.9
1	Gold Coast	45	Male	Yes	Yes	No	No	20x	0.19	Unsuspicious 0-0.2	Negative <0.49	Negative	NA	Back	2.68
1	Gold Coast	58	Male	Yes	Yes	No	No	20x	0.84	Suspicious 0.5-1.0	Positive >0.50	Positive	MIS	Back	16.47
1	Gold Coast	65	Female	No	No	No	No	20x	0.95	Suspicious 0.5-1.0	Positive >0.50	Positive	Invasive	Leg (lower)	7.54
1	Gold Coast	72	Female	Yes	No	No	No	20x	0.88	Suspicious 0.5-1.0	Positive >0.50	Positive	Invasive	Thigh (upper leg)	15.03
1	Gold Coast	64	Male	Yes	No	Yes	No	20x	0.9	Suspicious 0.5-1.0	Positive >0.50	Negative	NA	Chest	18.58
1	Gold Coast	64	Male	Yes	No	No	No	20x	0.8	Suspicious 0.5-1.0	Positive >0.50	Negative	NA	Back	8.8
1	Gold Coast	68	Female	No	No	No	Yes	20x	0.93	Suspicious 0.5-1.0	Positive >0.50	Negative	NA	Back	11.09
1	Gold Coast	68	Female	No	No	No	Yes	20x	0.9	Suspicious 0.5-1.0	Positive >0.50	Negative	NA	Back	13.05
1	Gold Coast	68	Male	No	No	No	No	20x	0.12	Unsuspicious 0-0.2	Negative <0.49	Negative	NA	Back	13.71
1	Gold Coast	73	Male	Yes	No	No	No	20x	0.95	Suspicious 0.5-1.0	Positive >0.50	Positive	MIS	Shoulder	13.72
1	Gold Coast	73	Male	Yes	No	No	No	20x	0.92	Suspicious 0.5-1.0	Positive >0.50	Positive	MIS	Back	19.43
1	Gold Coast	66	Male	No	No	No	No	20x	0.83	Suspicious 0.5-1.0	Positive >0.50	Positive	MIS	Back	18.28
1	Gold Coast	66	Male	No	No	No	No	20x	0.13	Unsuspicious 0-0.2	Negative <0.49	Positive	MIS	Neck	15.66
1	Gold Coast	54	Male	No	Yes	No	No	20x	0.59	Suspicious 0.5-1.0	Positive >0.50	Positive	MIS	Back	10.68
1	Gold Coast	64	Female	Yes	Yes	No	No	20x	0.9	Suspicious 0.5-1.0	Positive >0.50	Positive	MIS	Back	14.23
1	Gold Coast	64	Female	Yes	Yes	No	No	20x	0.83	Suspicious 0.5-1.0	Positive >0.50	Positive	Invasive	Back	14
1	Gold Coast	32	Male	No	No	No	No	20x	0.87	Suspicious 0.5-1.0	Positive >0.50	Negative	NA	Face	13.71
1	Gold Coast	32	Male	No	No	No	No	20x	0.26	Requires Classification 0.21-0.49	Negative <0.49	Negative	NA	Neck	5.79
1	Gold Coast	66	Female	No	No	No	No	20x	0.82	Suspicious 0.5-1.0	Positive >0.50	Positive	MIS	Chest	19.87
1	Gold Coast	42	Male	Yes	Yes	No	No	20x	0.81	Suspicious 0.5-1.0	Positive >0.50	Negative	NA	Back	11.1
1	Gold Coast	34	Male	No	No	Yes	No	20x	0.92	Suspicious 0.5-1.0	Positive >0.50	Negative	NA	Chest	2.26
1	Gold Coast	43	Female	Yes	No	No	No	20x	0.47	Requires Classification 0.21-0.49	Negative <0.49	Negative	NA	Back	19.32
1	Gold Coast	61	Female	No	No	No	No	20x	0.31	Requires Classification 0.21-0.49	Negative <0.49	Negative	NA	Thigh (upper leg)	27.1
1	Gold Coast	56	Male	No	No	No	No	20x	0.8	Suspicious 0.5-1.0	Positive >0.50	Negative	NA	Chest	4.82
1	Gold Coast	56	Male	No	No	No	No	20x	0.95	Suspicious 0.5-1.0	Positive >0.50	Positive	MIS	Ear	34.28
1	Gold Coast	54	Male	Yes	Yes	No	No	20x	0.77	Suspicious 0.5-1.0	Positive >0.50	Negative	NA	Back	3.03
1	Gold Coast	63	Male	Yes	No	No	No	20x	0.87	Suspicious 0.5-1.0	Positive >0.50	Positive	MIS	Back	10.38
1	Gold Coast	48	Male	Yes	No	Yes	No	20x	0.11	Unsuspicious 0-0.2	Negative <0.49	Positive	MIS	Back	29.34
1	Gold Coast	47	Male	Yes	Yes	No	No	20x	0.8	Suspicious 0.5-1.0	Positive >0.50	Positive	MIS	Back	21.01
1	Gold Coast	47	Male	Yes	Yes	No	No	20x	0.87	Suspicious 0.5-1.0	Positive >0.50	Negative	NA	Shoulder	7.56
1	Gold Coast	47	Male	Yes	Yes	No	No	20x	0.81	Suspicious 0.5-1.0	Positive >0.50	Negative	NA	Shoulder	7.76
1	Gold Coast	47	Male	Yes	Yes	No	No	20x	0.83	Suspicious 0.5-1.0	Positive >0.50	Negative	NA	Shoulder	3.62
1	Gold Coast	49	Male	No	No	No	No	20x	0.39	Requires Classification 0.21-0.49	Negative <0.49	Negative	NA	Thigh (upper leg)	1.53
1	Gold Coast	65	Female	No	No	No	Yes	20x	0.17	Unsuspicious 0-0.2	Negative <0.49	Negative	NA	Back	14.8
1	Gold Coast	62	Male	No	No	No	No	20x	0.26	Requires Classification 0.21-0.49	Negative <0.49	Negative	NA	Heel/foot	4.18
1	Gold Coast	61	Male	No	Yes	No	No	20x	0.1	Unsuspicious 0-0.2	Negative <0.49	Positive	MIS	Thigh (upper leg)	21.43
1	Gold Coast	54	Female	No	No	No	No	20x	0.72	Suspicious 0.5-1.0	Positive >0.50	Positive	Invasive	Leg (lower)	28.82
1	Gold Coast	70	Female	No	No	No	No	20x	0.93	Suspicious 0.5-1.0	Positive >0.50	Positive	Invasive	Thigh (upper leg)	13.92
1	Gold Coast	37	Male	No	No	Yes	No	20x	0.79	Suspicious 0.5-1.0	Positive >0.50	Positive	Invasive	Chest	25.24
1	Gold Coast	28	Female	Yes	No	Yes	No	20x	0.19	Unsuspicious 0-0.2	Negative <0.49	Positive	MIS	Shoulder	16.93
1	Gold Coast	49	Male	Yes	No	No	No	20x	0.12	Unsuspicious 0-0.2	Negative <0.49	Negative	NA	Back	26.5
1	Gold Coast	40	Male	No	No	No	No	20x	0.16	Unsuspicious 0-0.2	Negative <0.49	Negative	NA	Heel/foot	27.52
1	Gold Coast	49	Female	No	No	No	No	20x	0.45	Requires Classification 0.21-0.49	Negative <0.49	Positive	MIS	Arm	28.46
1	Gold Coast	49	Female	No	No	No	No	20x	0.87	Suspicious 0.5-1.0	Positive >0.50	Negative	NA	Neck	22.98
1	Gold Coast	43	Male	Yes	Yes	No	No	20x	0.62	Suspicious 0.5-1.0	Positive >0.50	Negative	NA	Back	10.63
1	Gold Coast	53	Female	No	No	No	No	20x	0.13	Unsuspicious 0-0.2	Negative <0.49	Negative	NA	Arm	15.99
1	Gold Coast	53	Female	No	No	No	No	20x	0.11	Unsuspicious 0-0.2	Negative <0.49	Negative	NA	Back	11.64
1	Gold Coast	41	Male	No	No	No	No	20x	0.39	Requires Classification 0.21-0.49	Negative <0.49	Positive	MIS	Back	12.94
1	Gold Coast	63	Female	No	No	No	No	20x	0.12	Unsuspicious 0-0.2	Negative <0.49	Negative	NA	Back	10.94
1	Gold Coast	55	Female	No	No	Yes	No	20x	0.95	Suspicious 0.5-1.0	Positive >0.50	Negative	NA	Arm	12.32
1	Gold Coast	33	Male	Yes	No	Yes	No	20x	0.11	Unsuspicious 0-0.2	Negative <0.49	Negative	NA	Back	10.59
1	Gold Coast	29	Male	No	No	No	No	20x	0.78	Suspicious 0.5-1.0	Positive >0.50	Negative	NA	Back	43.67
1	Gold Coast	29	Male	No	No	No	No	20x	0.89	Suspicious 0.5-1.0	Positive >0.50	Negative	NA	Back	17.3
1	Gold Coast	29	Male	No	No	No	No	20x	0.6	Suspicious 0.5-1.0	Positive >0.50	Negative	NA	Back	14.39
1	Gold Coast	50	Female	No	No	No	No	20x	0.81	Suspicious 0.5-1.0	Positive >0.50	Negative	NA	Back	17.11
1	Gold Coast	77	Female	No	Yes	No	No	20x	0.67	Suspicious 0.5-1.0	Positive >0.50	Positive	MIS	Back	17.62
1	Gold Coast	77	Female	No	Yes	No	No	20x	0.85	Suspicious 0.5-1.0	Positive >0.50	Positive	Invasive	Back	15.12
1	Gold Coast	77	Female	No	Yes	No	No	20x	0.85	Suspicious 0.5-1.0	Positive >0.50	Negative	NA	Back	20.18
1	Gold Coast	77	Female	No	Yes	No	No	20x	0.57	Suspicious 0.5-1.0	Positive >0.50	Negative	NA	Back	20.57
1	Gold Coast	44	Female	No	No	No	No	20x	0.36	Requires Classification 0.21-0.49	Negative <0.49	Negative	NA	Shoulder	6.48
1	Gold Coast	62	Male	Yes	No	Yes	No	20x	0.92	Suspicious 0.5-1.0	Positive >0.50	Positive	MIS	Arm	11.62
1	Gold Coast	74	Male	No	No	Yes	No	20x	0.56	Suspicious 0.5-1.0	Positive >0.50	Negative	NA	Neck	28.01
1	Gold Coast	33	Male	No	Yes	No	No	20x	0.1	Unsuspicious 0-0.2	Negative <0.49	Negative	NA	Arm	4.17
1	Gold Coast	71	Male	No	No	No	No	20x	0.88	Suspicious 0.5-1.0	Positive >0.50	Positive	MIS	Back	33.06
1	Gold Coast	60	Female	Yes	No	No	No	20x	0.88	Suspicious 0.5-1.0	Positive >0.50	Negative	NA	Shoulder	2.44
1	Gold Coast	62	Male	Yes	Yes	No	No	20x	0.9	Suspicious 0.5-1.0	Positive >0.50	Positive	MIS	Back	14.93
1	Gold Coast	37	Male	Yes	No	Yes	No	20x	0.18	Unsuspicious 0-0.2	Negative <0.49	Negative	NA	Shoulder	42.2
1	Gold Coast	38	Male	No	No	No	No	20x	0.88	Suspicious 0.5-1.0	Positive >0.50	Negative	NA		21.03
1	Gold Coast	72	Female	No	No	No	No	20x	0.89	Suspicious 0.5-1.0	Positive >0.50	Negative	NA	Arm	6.71
1	Gold Coast	69	Male	No	No	No	No	20x	0.9	Suspicious 0.5-1.0	Positive >0.50	Negative	NA	Leg (lower)	14.68
1	Gold Coast	69	Male	No	No	No	No	20x	0.1	Unsuspicious 0-0.2	Negative <0.49	Negative	NA	Shoulder	29.28
1	Gold Coast	52	Male	No	No	No	No	20x	0.29	Requires Classification 0.21-0.49	Negative <0.49	Positive	Invasive	Arm	9.45
1	Gold Coast	70	Male	No	No	No	No	20x	0.8	Suspicious 0.5-1.0	Positive >0.50	Negative	NA	Arm	2.35
1	Gold Coast	50	Male	No	No	No	No	20x	0.4	Requires Classification 0.21-0.49	Negative <0.49	Negative	NA	Back	15.44
1	Gold Coast	69	Male	Yes	No	No	No	20x	0.78	Suspicious 0.5-1.0	Positive >0.50	Positive	Invasive	Back	18.64
1	Gold Coast	33	Male	No	No	No	No	20x	0.12	Unsuspicious 0-0.2	Negative <0.49	Negative	NA	Shoulder	17.36
1	Gold Coast	65	Male	Yes	No	No	No	20x	0.74	Suspicious 0.5-1.0	Positive >0.50	Negative	NA	Back	6.26
2	Townsville	63	Male	No	No	No	No	20x	0.92	Suspicious 0.5-1.0	Positive >0.50	Positive	MIS	Chest	85.2
2	Townsville	53	Male	No	Yes	No	No	20x	0.06	Unsuspicious 0-0.2	Negative <0.49	Negative	NA	Back	14.09
2	Townsville	50	Female	No	No	No	No	20x	0.21	Requires Classification 0.21-0.49	Negative <0.49	Negative	NA	Back	3.15
2	Townsville	64	Female	No	No	Yes	No	20x	0.95	Suspicious 0.5-1.0	Positive >0.50	Negative	NA	Arm	50.55
2	Townsville	61	Male	No	No	No	No	20x	0.81	Suspicious 0.5-1.0	Positive >0.50	Positive	Invasive	Leg (lower)	75.39
2	Townsville	28	Male	No	No	No	No	20x	0.76	Suspicious 0.5-1.0	Positive >0.50	Negative	NA	Back	2.04
2	Townsville	30	Female	No	No	No	Yes	20x	0.95	Suspicious 0.5-1.0	Positive >0.50	Negative	NA	Abdomen	0.73
2	Townsville	49	Male	No	No	No	No	20x	0.06	Unsuspicious 0-0.2	Negative <0.49	Negative	NA	Leg (lower)	6.88
2	Townsville	52	Female	Yes	No	No	No	20x	0.36	Requires Classification 0.21-0.49	Negative <0.49	Positive	MIS	Arm	13.63
2	Townsville	69	Male	No	No	No	No	20x	0.95	Suspicious 0.5-1.0	Positive >0.50	Positive	Invasive	Chest	64.95
2	Townsville	58	Female	Yes	No	No	No	20x	0.91	Suspicious 0.5-1.0	Positive >0.50	Positive	MIS	Arm	70.22
2	Townsville	55	Male	No	No	No	No	20x	0.95	Suspicious 0.5-1.0	Positive >0.50	Negative	NA	Arm	21.62
2	Townsville	67	Male	No	Yes	No	No	20x	0.95	Suspicious 0.5-1.0	Positive >0.50	Negative	NA	Back	69.83
2	Townsville	80	Male	No	Yes	No	No	20x	0.36	Requires Classification 0.21-0.49	Negative <0.49	Negative	NA	Arm	8.32
2	Townsville	74	Male	No	Yes	No	No	20x	0.94	Suspicious 0.5-1.0	Positive >0.50	Positive	Invasive	Arm	20.44
2	Townsville	32	Female	No	No	No	No	20x	0.11	Unsuspicious 0-0.2	Negative <0.49	Negative	NA	Thigh (upper leg)	3.85
2	Townsville	73	Male	No	No	No	No	20x	0.05	Unsuspicious 0-0.2	Negative <0.49	Negative	NA	Back	4.76
2	Townsville	65	Male	No	No	No	No	20x	0.05	Unsuspicious 0-0.2	Negative <0.49	Negative	NA	Thigh (upper leg)	13.6
2	Townsville	53	Male	No	No	No	No	20x	0.26	Requires Classification 0.21-0.49	Negative <0.49	Negative	NA	Shoulder	15.16
2	Townsville	80	Male	No	Yes	No	No	20x	0.94	Suspicious 0.5-1.0	Positive >0.50	Negative	NA	Leg (lower)	46.1
2	Townsville	56	Female	No	Yes	No	No	20x	0.94	Suspicious 0.5-1.0	Positive >0.50	Negative	NA	Leg (lower)	46.75
2	Townsville	64	Female	No	Yes	No	No	20x	0.15	Unsuspicious 0-0.2	Negative <0.49	Positive	MIS	Arm	6.38
2	Townsville	67	Male	No	No	No	No	20x	0.91	Suspicious 0.5-1.0	Positive >0.50	Negative	NA	Back	60.5
2	Townsville	70	Male	No	No	No	No	20x	0.95	Suspicious 0.5-1.0	Positive >0.50	Negative	NA	Back	23.64
2	Townsville	60	Female	Yes	No	No	No	20x	0.18	Unsuspicious 0-0.2	Negative <0.49	Negative	NA	Back	4.33
2	Townsville	34	Male	Yes	No	Yes	No	20x	0.08	Unsuspicious 0-0.2	Negative <0.49	Negative	NA	Chest	13.4
2	Townsville	68	Male	No	No	No	No	20x	0.91	Suspicious 0.5-1.0	Positive >0.50	Positive	MIS	Back	64.73
2	Townsville	62	Female	No	No	No	No	20x	0.74	Suspicious 0.5-1.0	Positive >0.50	Negative	NA	Arm	7.56
2	Townsville	38	Female	No	No	No	No	20x	0.05	Unsuspicious 0-0.2	Negative <0.49	Negative	NA	Back	1.94
2	Townsville	66	Male	No	No	No	No	20x	0.05	Unsuspicious 0-0.2	Negative <0.49	Positive	Invasive	Back	8.74
2	Townsville	36	Female	No	No	No	No	20x	0.06	Unsuspicious 0-0.2	Negative <0.49	Negative	NA	Arm	5.19
2	Townsville	64	Female	No	Yes	No	No	20x	0.95	Suspicious 0.5-1.0	Positive >0.50	Negative	NA	Chest	22.84
2	Townsville	79	Male	No	No	No	No	20x	0.95	Suspicious 0.5-1.0	Positive >0.50	Negative	NA	Arm	24.62
2	Townsville	49	Male	No	Yes	No	No	20x	0.06	Unsuspicious 0-0.2	Negative <0.49	Negative	NA	Back	9.74
2	Townsville	81	Female	No	No	No	No	20x	0.1	Unsuspicious 0-0.2	Negative <0.49	Negative	NA	Arm	72
2	Townsville	33	Male	No	No	No	No	20x	0.05	Unsuspicious 0-0.2	Negative <0.49	Negative	NA	Thigh (upper leg)	7.42
2	Townsville	86	Male	No	Yes	No	No	20x	0.15	Unsuspicious 0-0.2	Negative <0.49	Negative	NA	Arm	13.93
2	Townsville	57	Male	No	No	No	No	20x	0.08	Unsuspicious 0-0.2	Negative <0.49	Negative	NA	Shoulder	1.17
2	Townsville	51	Female	No	Yes	Yes	No	20x	0.08	Unsuspicious 0-0.2	Negative <0.49	Negative	NA	Back	7.58
2	Townsville	42	Female	No	Yes	Yes	No	20x	0.3	Requires Classification 0.21-0.49	Negative <0.49	Negative	NA	Shoulder	6.66
2	Townsville	79	Male	No	Yes	No	No	20x	0.93	Suspicious 0.5-1.0	Positive >0.50	Negative	NA	Arm	58.61
2	Townsville	58	Female	No	No	No	No	20x	0.05	Unsuspicious 0-0.2	Negative <0.49	Negative	NA	Arm	2.37
2	Townsville	80	Male	No	No	No	No	20x	0.95	Suspicious 0.5-1.0	Positive >0.50	Positive	MIS	Ear	17.85
2	Townsville	36	Male	No	No	Yes	Yes	20x	0.05	Unsuspicious 0-0.2	Negative <0.49	Negative	NA	Back	13.44
2	Townsville	51	Male	No	No	No	No	20x	0.05	Unsuspicious 0-0.2	Negative <0.49	Negative	NA	Back	5.63
2	Townsville	28	Female	No	No	Yes	No	20x	0.05	Unsuspicious 0-0.2	Negative <0.49	Negative	NA	Arm	0.82
2	Townsville	28	Female	No	No	Yes	No	20x	0.05	Unsuspicious 0-0.2	Negative <0.49	Negative	NA	Back	7.38
2	Townsville	51	Female	No	No	Yes	Yes	20x	0.14	Unsuspicious 0-0.2	Negative <0.49	Negative	NA	Thigh (upper leg)	8.11
2	Townsville	66	Male	Yes	No	No	No	20x	0.9	Suspicious 0.5-1.0	Positive >0.50	Negative	NA	Back	14.31
2	Townsville	38	Female	No	Yes	Yes	No	20x	0.05	Unsuspicious 0-0.2	Negative <0.49	Negative	NA	Arm	13
2	Townsville	48	Female	No	Yes	No	No	20x	0.1	Unsuspicious 0-0.2	Negative <0.49	Negative	NA	Abdomen	1.86
2	Townsville	67	Female	No	No	No	No	20x	0.07	Unsuspicious 0-0.2	Negative <0.49	Negative	NA	Abdomen	23.35
2	Townsville	31	Female	No	No	No	No	20x	0.18	Unsuspicious 0-0.2	Negative <0.49	Negative	NA	Arm	1.35
2	Townsville	32	Female	No	No	No	No	20x	0.7	Suspicious 0.5-1.0	Positive >0.50	Positive	MIS	Leg (lower)	32.08
2	Townsville	61	Male	No	No	No	No	20x	0.83	Suspicious 0.5-1.0	Positive >0.50	Negative	NA	Thigh (upper leg)	28.58
2	Townsville	55	Male	No	No	No	No	20x	0.06	Unsuspicious 0-0.2	Negative <0.49	Positive	MIS	Leg (lower)	7.85
2	Townsville	56	Male	No	No	No	No	20x	0.91	Suspicious 0.5-1.0	Positive >0.50	Positive	MIS	Back	94.58
2	Townsville	56	Female	No	No	No	No	20x	0.82	Suspicious 0.5-1.0	Positive >0.50	Negative	NA	Leg (lower)	1.23
2	Townsville	68	Female	No	No	No	No	20x	0.95	Suspicious 0.5-1.0	Positive >0.50	Negative	NA	Back	5.05
2	Townsville	33	Male	No	No	No	No	20x	0.5	Suspicious 0.5-1.0	Positive >0.50	Negative	NA	Back	10.65
2	Townsville	72	Female	No	No	No	No	20x	0.95	Suspicious 0.5-1.0	Positive >0.50	Negative	NA	Back	11.17
2	Townsville	60	Female	No	No	No	No	20x	0.94	Suspicious 0.5-1.0	Positive >0.50	Negative	NA	Leg (lower)	22.53
2	Townsville	52	Male	No	No	No	No	20x	0.13	Unsuspicious 0-0.2	Negative <0.49	Negative	NA	Arm	5.45
2	Townsville	65	Female	No	Yes	No	No	20x	0.05	Unsuspicious 0-0.2	Negative <0.49	Negative	NA	Thigh (upper leg)	19.32
2	Townsville	66	Female	No	Yes	No	No	20x	0.91	Suspicious 0.5-1.0	Positive >0.50	Negative	NA	Abdomen	24.27
2	Townsville	39	Female	No	Yes	No	No	20x	0.68	Suspicious 0.5-1.0	Positive >0.50	Negative	NA	Arm	2.93
2	Townsville	39	Female	No	Yes	No	No	20x	0.05	Unsuspicious 0-0.2	Negative <0.49	Negative	NA	Arm	10.95
2	Townsville	19	Male	No	Yes	No	No	20x	0.79	Suspicious 0.5-1.0	Positive >0.50	Negative	NA	Neck	7.48
2	Townsville	45	Female	No	No	Yes	No	20x	0.07	Unsuspicious 0-0.2	Negative <0.49	Negative	NA	Leg (lower)	1.79
2	Townsville	65	Female	No	No	Yes	No	20x	0.93	Suspicious 0.5-1.0	Positive >0.50	Negative	NA	Arm	91.44
2	Townsville	32	Female	No	No	Yes	Yes	20x	0.05	Unsuspicious 0-0.2	Negative <0.49	Negative	NA	Arm	3.33
2	Townsville	68	Male	No	Yes	No	No	20x	0.08	Unsuspicious 0-0.2	Negative <0.49	Negative	NA	Thigh (upper leg)	8.47
2	Townsville	21	Female	No	No	Yes	Yes	20x	0.21	Requires Classification 0.21-0.49	Negative <0.49	Negative	NA	Head/scalp	42.17
2	Townsville	53	Female	No	No	Yes	No	20x	0.9	Suspicious 0.5-1.0	Positive >0.50	Negative	NA	Neck	9.2
2	Townsville	53	Female	No	No	No	No	20x	0.11	Unsuspicious 0-0.2	Negative <0.49	Negative	NA	Back	11.49
2	Townsville	13	Female	No	No	No	No	20x	0.36	Requires Classification 0.21-0.49	Negative <0.49	Negative	NA	Back	2.65
2	Townsville	19	Female	No	No	No	No	20x	0.05	Unsuspicious 0-0.2	Negative <0.49	Negative	NA	Heel/foot	2.41
2	Townsville	62	Female	No	No	No	No	20x	0.4	Requires Classification 0.21-0.49	Negative <0.49	Positive	MIS	Arm	26.92
2	Townsville	63	Male	No	No	Yes	No	20x	0.26	Requires Classification 0.21-0.49	Negative <0.49	Positive	Invasive	Arm	47.17
2	Townsville	24	Male	No	No	No	No	20x	0.05	Unsuspicious 0-0.2	Negative <0.49	Negative	NA	Leg (lower)	2.13
2	Townsville	43	Female	No	No	No	No	20x	0.07	Unsuspicious 0-0.2	Negative <0.49	Negative	NA	Back	41.04
2	Townsville	72	Female	No	No	No	No	20x	0.16	Unsuspicious 0-0.2	Negative <0.49	Negative	NA	Leg (lower)	8.18
2	Townsville	39	Male	No	No	No	No	20x	0.31	Requires Classification 0.21-0.49	Negative <0.49	Negative	NA	Arm	11.58
2	Townsville	48	Female	No	No	No	No	20x	0.95	Suspicious 0.5-1.0	Positive >0.50	Negative	NA	Head/scalp	8.42
2	Townsville	31	Male	Yes	No	Yes	No	20x	0.06	Unsuspicious 0-0.2	Negative <0.49	Negative	NA	Arm	3.39
2	Townsville	77	Male	No	No	No	No	20x	0.06	Unsuspicious 0-0.2	Negative <0.49	Positive	MIS	Back	14.3
2	Townsville	43	Female	No	No	Yes	No	20x	0.94	Suspicious 0.5-1.0	Positive >0.50	Positive	MIS	Back	38.84
3	Townsville	32	Male	No	No	Yes	Yes	20x	0.7	Suspicious 0.5-1.0	Positive >0.50	Positive	MIS	Neck	4.38
3	Townsville	51	Female	No	No	No	No	20x	0.07	Unsuspicious 0-0.2	Negative <0.49	Negative	NA	Leg (lower)	1.66
3	Townsville	74	Male	No	Yes	No	No	20x	0.1	Unsuspicious 0-0.2	Negative <0.49	Negative	NA	Arm	40.23
3	Townsville	58	Male	No	No	Yes	Yes	20x	0.05	Unsuspicious 0-0.2	Negative <0.49	Negative	NA	Back	9.11
3	Townsville	21	Female	No	No	Yes	No	20x	0.08	Unsuspicious 0-0.2	Negative <0.49	Negative	NA	Back	10.74
3	Townsville	65	Male	No	No	No	No	20x	0.94	Suspicious 0.5-1.0	Positive >0.50	Positive	MIS	Back	92.85
3	Townsville	35	Female	No	No	Yes	No	20x	0.55	Suspicious 0.5-1.0	Negative <0.49	Positive	MIS	Thigh (upper leg)	5.6
3	Townsville	36	Female	No	Yes	No	No	20x	0.43	Requires Classification 0.21-0.49	Positive >0.50	Negative	NA	Back	37.45
3	Townsville	69	Male	No	Yes	No	No	20x	0.95	Suspicious 0.5-1.0	Negative <0.49	Negative	NA	Chest	54.32
3	Townsville	77	Male	No	Yes	No	No	20x	0.31	Requires Classification 0.21-0.49	Negative <0.49	Negative	NA	Back	11.98
3	Townsville	74	Male	No	Yes	No	No	20x	0.19	Unsuspicious 0-0.2	Negative <0.49	Negative	NA	Heel/foot	36.74
3	Townsville	74	Male	No	No	No	No	20x	0.06	Unsuspicious 0-0.2	Negative <0.49	Negative	NA	Back	19.15
3	Townsville	72	Male	No	No	No	No	20x	0.32	Requires Classification 0.21-0.49	Negative <0.49	Positive	MIS	Back	56.9
3	Townsville	85	Female	No	No	Yes	No	20x	0.95	Suspicious 0.5-1.0	Positive >0.50	Negative	NA	Arm	40
3	Townsville	79	Male	No	No	No	No	20x	0.95	Suspicious 0.5-1.0	Positive >0.50	Negative	NA	Back	22.76
3	Townsville	83	Male	No	Yes	No	No	20x	0.58	Suspicious 0.5-1.0	Positive >0.50	Negative	NA	Neck	92.82
3	Townsville	78	Male	No	No	No	No	20x	0.89	Suspicious 0.5-1.0	Positive >0.50	Negative	NA	Back	20.77
3	Townsville	52	Male	Yes	No	No	Yes	20x	0.42	Requires Classification 0.21-0.49	Negative <0.49	Negative	NA	Face	12.76
3	Townsville	59	Male	No	No	No	No	20x	0.95	Suspicious 0.5-1.0	Positive >0.50	Negative	NA	Back	51
3	Townsville	74	Female	No	No	Yes	No	20x	0.95	Suspicious 0.5-1.0	Positive >0.50	Negative	NA	Chest	12.42
3	Townsville	60	Male	No	Yes	Yes	No	20x	0.94	Suspicious 0.5-1.0	Positive >0.50	Negative	NA	Shoulder	15
3	Townsville	51	Female	No	No	No	No	20x	0.05	Unsuspicious 0-0.2	Negative <0.49	Negative	NA	Back	20.11
3	Townsville	34	Male	No	No	No	No	20x	0.93	Suspicious 0.5-1.0	Positive >0.50	Negative	NA	Face	4.92
3	Townsville	69	Male	No	Yes	Yes	No	20x	0.95	Suspicious 0.5-1.0	Positive >0.50	Negative	NA	Back	25.98
3	Townsville	65	Male	No	No	Yes	No	20x	0.85	Suspicious 0.5-1.0	Positive >0.50	Negative	NA	Back	75.7
3	Townsville	58	Female	No	No	No	Yes	20x	0.95	Suspicious 0.5-1.0	Positive >0.50	Positive	MIS	Face	46
3	Townsville	50	Male	No	Yes	No	No	20x	0.91	Suspicious 0.5-1.0	Positive >0.50	Negative	NA	Back	22.47
3	Townsville	46	Male	No	No	Yes	No	20x	0.06	Unsuspicious 0-0.2	Negative <0.49	Positive	Invasive	Back	14.88
3	Townsville	46	Male	No	No	No	No	20x	0.95	Suspicious 0.5-1.0	Positive >0.50	Negative	NA	Leg (lower)	25.7
3	Townsville	46	Male	No	No	No	No	20x	0.94	Suspicious 0.5-1.0	Positive >0.50	Negative	NA	Arm	20.2
3	Townsville	73	Male	No	Yes	Yes	No	20x	0.95	Suspicious 0.5-1.0	Positive >0.50	Negative	NA	Arm	63
3	Townsville	56	Male	No	Yes	No	No	20x	0.78	Suspicious 0.5-1.0	Positive >0.50	Positive	Invasive	Neck	15.65
3	Townsville	67	Male	No	Yes	No	No	20x	0.93	Suspicious 0.5-1.0	Positive >0.50	Positive	Invasive	Arm	90.58
3	Townsville	89	Female	Yes	No	Yes	No	20x	0.95	Suspicious 0.5-1.0	Positive >0.50	Negative	NA	Arm	65.65
3	Townsville	73	Male	No	Yes	No	No	20x	0.16	Unsuspicious 0-0.2	Negative <0.49	Negative	NA	Arm	55.88
3	Townsville	59	Male	No	No	No	No	20x	0.88	Suspicious 0.5-1.0	Positive >0.50	Negative	NA	Back	10.7
3	Townsville	75	Male	No	Yes	No	No	20x	0.84	Suspicious 0.5-1.0	Positive >0.50	Positive	MIS	Back	83.17
3	Townsville	75	Male	No	Yes	No	No	20x	0.58	Suspicious 0.5-1.0	Positive >0.50	Negative	NA	Arm	56.5
3	Townsville	79	Female	No	No	No	No	20x	0.95	Suspicious 0.5-1.0	Positive >0.50	Positive	MIS	Arm	79
3	Townsville	75	Male	No	Yes	No	No	20x	0.9	Suspicious 0.5-1.0	Positive >0.50	Negative	NA	Back	22.84
3	Townsville	58	Male	No	Yes	No	No	20x	0.51	Suspicious 0.5-1.0	Positive >0.50	Positive	MIS	Thigh (upper leg)	13.32
3	Townsville	67	Male	No	No	No	No	20x	0.07	Unsuspicious 0-0.2	Negative <0.49	Positive	MIS	Back	33.89
3	Townsville	59	Male	No	No	Yes	No	20x	0.18	Unsuspicious 0-0.2	Negative <0.49	Positive	MIS	Arm	17.95
3	Townsville	70	Male	No	Yes	No	No	20x	0.8	Suspicious 0.5-1.0	Positive >0.50	Negative	NA	Back	8.87
3	Townsville	72	Male	No	No	Yes	Yes	20x	0.83	Suspicious 0.5-1.0	Positive >0.50	Negative	NA	Face	NR
3	Townsville	72	Male	No	No	Yes	Yes	20x	0.94	Suspicious 0.5-1.0	Positive >0.50	Negative	NA	Face	NR
3	Townsville	72	Male	No	No	Yes	Yes	20x	0.95	Suspicious 0.5-1.0	Positive >0.50	Negative	NA	Face	69.44
3	Townsville	65	Male	No	No	Yes	No	20x	0.94	Suspicious 0.5-1.0	Positive >0.50	Negative	NA	Leg (lower)	74.99
3	Townsville	54	Male	No	Yes	No	No	20x	0.5	Suspicious 0.5-1.0	Positive >0.50	Positive	MIS	Back	10.7
3	Townsville	54	Male	No	Yes	No	No	20x	0.92	Suspicious 0.5-1.0	Positive >0.50	Negative	NA	Back	16
3	Townsville	38	Female	No	Yes	Yes	No	20x	0.71	Suspicious 0.5-1.0	Positive >0.50	Negative	NA	Thigh (upper leg)	2.77
3	Townsville	72	Male	No	No	Yes	Yes	20x	0.93	Suspicious 0.5-1.0	Positive >0.50	Negative	NA	Arm	95.28
3	Townsville	49	Male	No	No	No	No	20x	0.92	Suspicious 0.5-1.0	Positive >0.50	Negative	NA	Leg (lower)	4.57
3	Townsville	49	Male	No	Yes	No	No	20x	0.95	Suspicious 0.5-1.0	Positive >0.50	Negative	NA	Chest	19.33
3	Townsville	75	Male	No	Yes	Yes	Yes	20x	0.08	Unsuspicious 0-0.2	Negative <0.49	Negative	NA	Heel/foot	93.9
3	Townsville	81	Female	No	No	Yes	No	20x	0.79	Suspicious 0.5-1.0	Positive >0.50	Negative	NA	Leg (lower)	27.11
3	Townsville	72	Male	No	No	No	No	20x	0.14	Unsuspicious 0-0.2	Negative <0.49	Negative	NA	Arm	59.63
4	Townsville	22	Male	Yes	No	Yes	Yes	20x	0.06	Unsuspicious 0-0.2	Negative <0.49	Negative	NA	Back	13.81
4	Townsville	22	Male	Yes	No	No	No	20x	0.05	Unsuspicious 0-0.2	Negative <0.49	Negative	NA	Leg (lower)	8.15
4	Townsville	67	Female	No	No	Yes	Yes	20x	0.78	Suspicious 0.5-1.0	Positive >0.50	Negative	NA	Heel/foot	97.97
4	Townsville	75	Male	No	No	No	No	20x	0.08	Unsuspicious 0-0.2	Negative <0.49	Negative	NA	Back	86.46
4	Townsville	75	Male	No	No	No	No	20x	0.9	Suspicious 0.5-1.0	Positive >0.50	Negative	NA	Shoulder	11.96
4	Townsville	49	Male	No	No	No	Yes	20x	0.49	Requires Classification 0.21-0.49	Negative <0.49	Negative	NA	Heel/foot	1.11
4	Townsville	35	Male	Yes	No	Yes	Yes	20x	0.81	Suspicious 0.5-1.0	Positive >0.50	Positive	MIS	Back	71.39
4	Townsville	35	Male	Yes	No	Yes	Yes	20x	0.05	Unsuspicious 0-0.2	Negative <0.49	Negative	NA	Leg (lower)	22.34
4	Townsville	76	Female	No	No	No	No	20x	0.2	Unsuspicious 0-0.2	Negative <0.49	Negative	NA	Thigh (upper leg)	13.95
4	Townsville	64	Male	No	No	No	No	20x	0.95	Suspicious 0.5-1.0	Positive >0.50	Positive	MIS	Neck	22.04
4	Townsville	64	Male	No	No	No	No	20x	0.95	Suspicious 0.5-1.0	Positive >0.50	Positive	MIS	Back	36.94
4	Townsville	31	Male	Yes	No	Yes	No	20x	0.94	Suspicious 0.5-1.0	Positive >0.50	Positive	MIS	Arm	84.52
4	Townsville	53	Female	No	No	Yes	Yes	20x	0.05	Unsuspicious 0-0.2	Negative <0.49	Negative	NA	Face	3.39
4	Townsville	45	Male	No	No	Yes	No	20x	0.95	Suspicious 0.5-1.0	Positive >0.50	Negative	NA	Face	13.29
